# Supplementary material for: Plasmonic gold dogbone nanorattles sniff out trace molecules through surface enhanced Raman scattering
Source: Royal Society of Chemistry journal article supplement (doi:10.1039/d3an00874f), 2023-01-01
Supplement: d3an00874f1.pdf [file d3an00874f1.pdf]

*Electronic Supplementary Information*

Plasmonic gold dogbone nanorattles sniff out trace  
molecules through surface enhanced Raman  
scattering

*Keshav Bhardwaj, Khushal Singh and Amit Jaiswal\**

School of Biosciences and Bioengineering, Indian Institute of Technology Mandi, Kamand,  
Mandi, Himachal Pradesh, India, Pincode: 175075

\* Corresponding author email: [j.amit@iitmandi.ac.in](mailto:j.amit@iitmandi.ac.in)

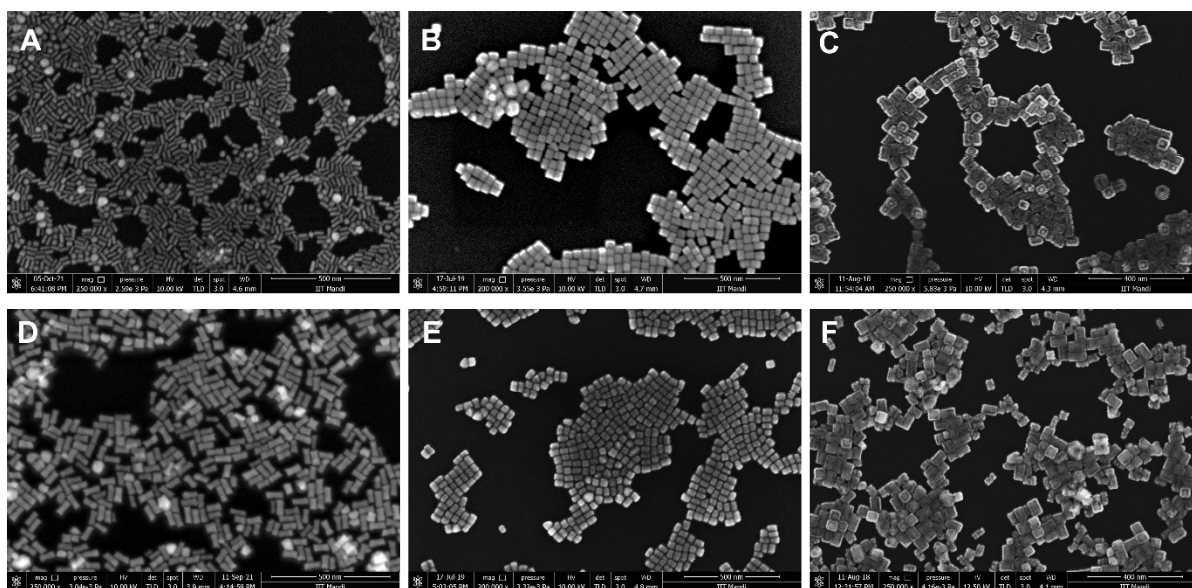

**Figure S1:** Shows the SEM for all synthesized nanoparticles; A) Au-NRs, B) Au-NR@Ag, C) Au-NRNRT, D) Au-DBs, E) Au-DB@Ag, and F) Au-DBNRTs.

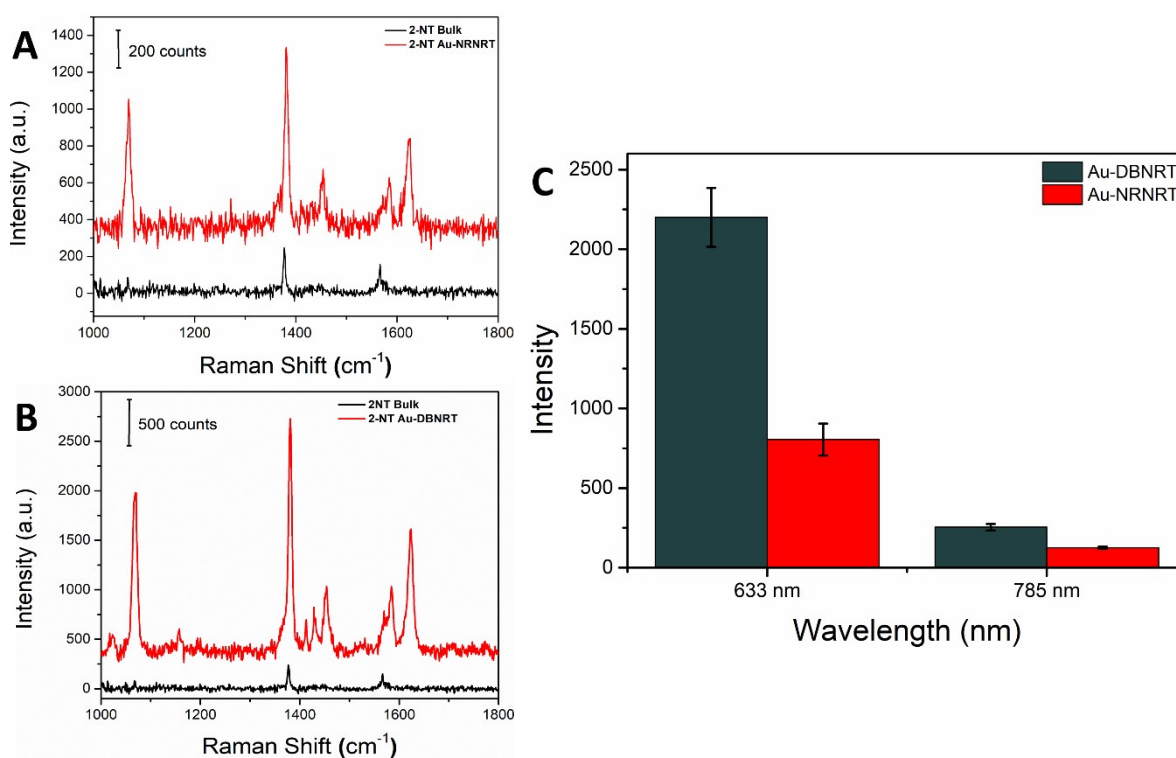

**Figure S2:** Comparison of uniformly distributed single particle SERS. A) Bulk 2-NT versus SERS using Au-NRNRTs, B) Bulk 2-NT versus SERS using Au-DBNRT and C) Comparison of SERS intensities at 633nm and 785nm excitation wavelength for prominent spectral band of 2-NT at 1381 $\text{cm}^{-1}$  with Au-DBNRT and Au-NRNRT.

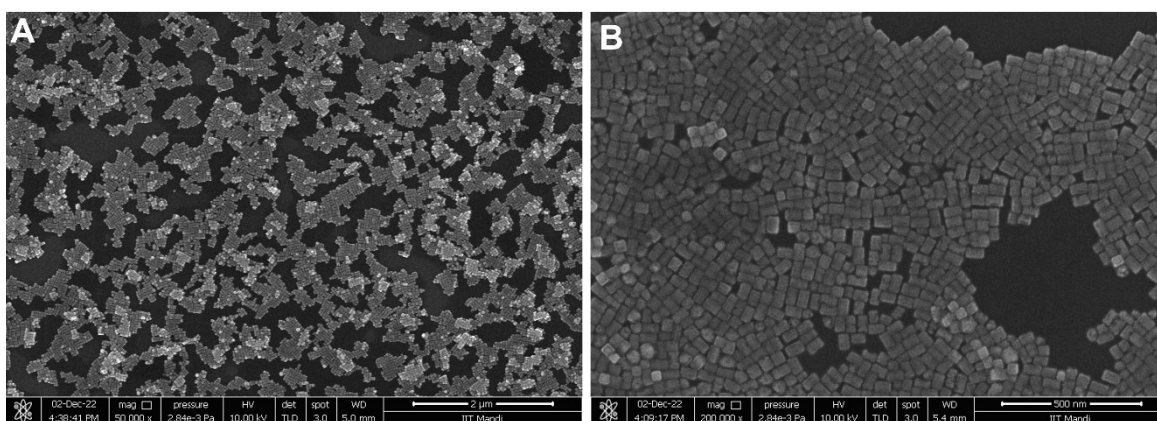

**Figure S3:** Shows the SEM image of the Au-DBNRT fabricated SERS substrate for sensing of thiabendazole; A & B) Au-DBNRT deposited si-substrate at scale bar= 2  $\mu\text{m}$ , and 500 nm respectively.

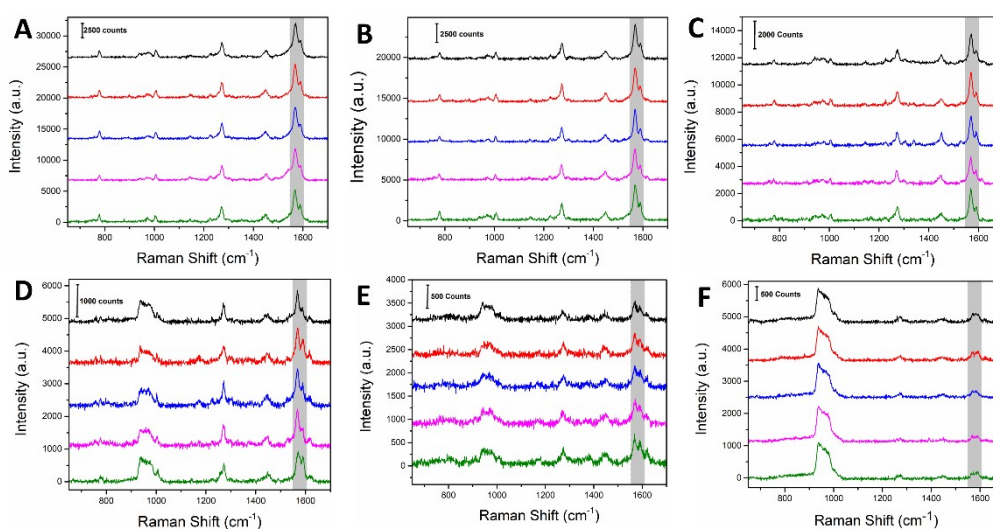

**Figure S4:** Data shows the reproducibility of SERS signals of thiabendazole at different concentrations A)  $10^{-3}\text{M}$ , B)  $10^{-4}\text{M}$ , C)  $10^{-5}\text{M}$ , D)  $10^{-6}\text{M}$ , E)  $10^{-7}\text{M}$ , and F)  $10^{-8}\text{M}$  (at 5 different spots on substrate).

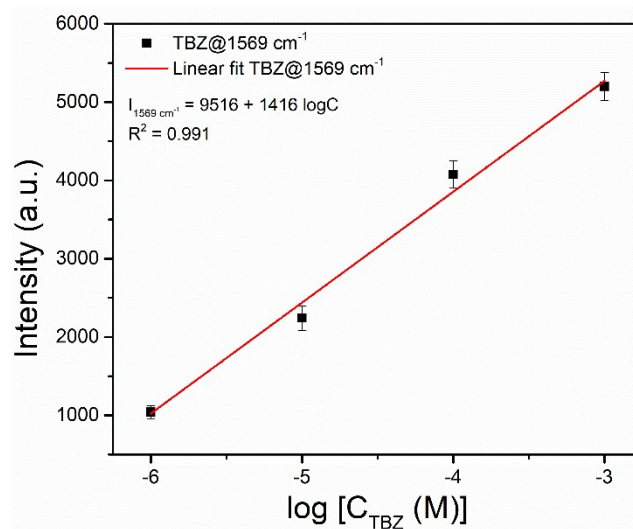

**Figure S5:** Data shows the linear relationship between SERS signal intensities at different concentrations of thiabendazole (TBZ).

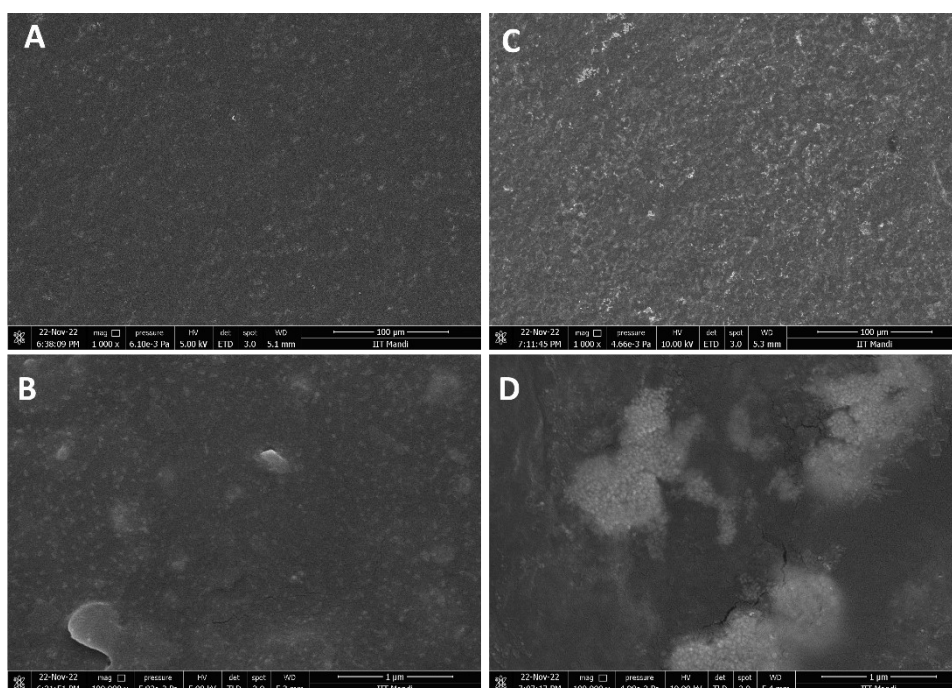

**Figure S6:** Shows the SEM characterization image for polymeric shrink films without heat treatment; A & B) Bare shrink film (at scale 100 and 1 μm respectively), C & D) Au-DBNRT deposited shrink film (at scale 100 and 1 μm respectively).

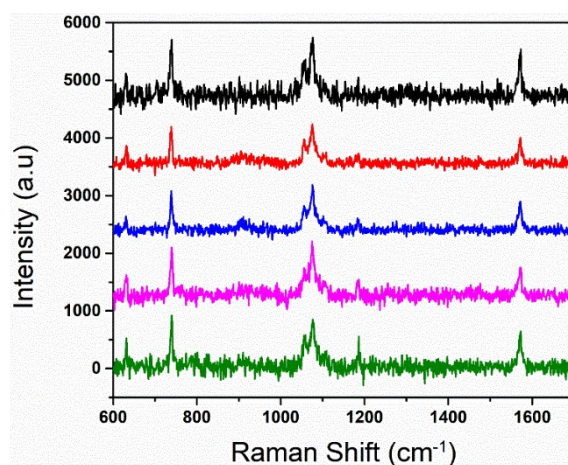

**Figure S7:** Represents the bulk Raman spectra for 1,4-BDT molecule with excitation source of 633 nm

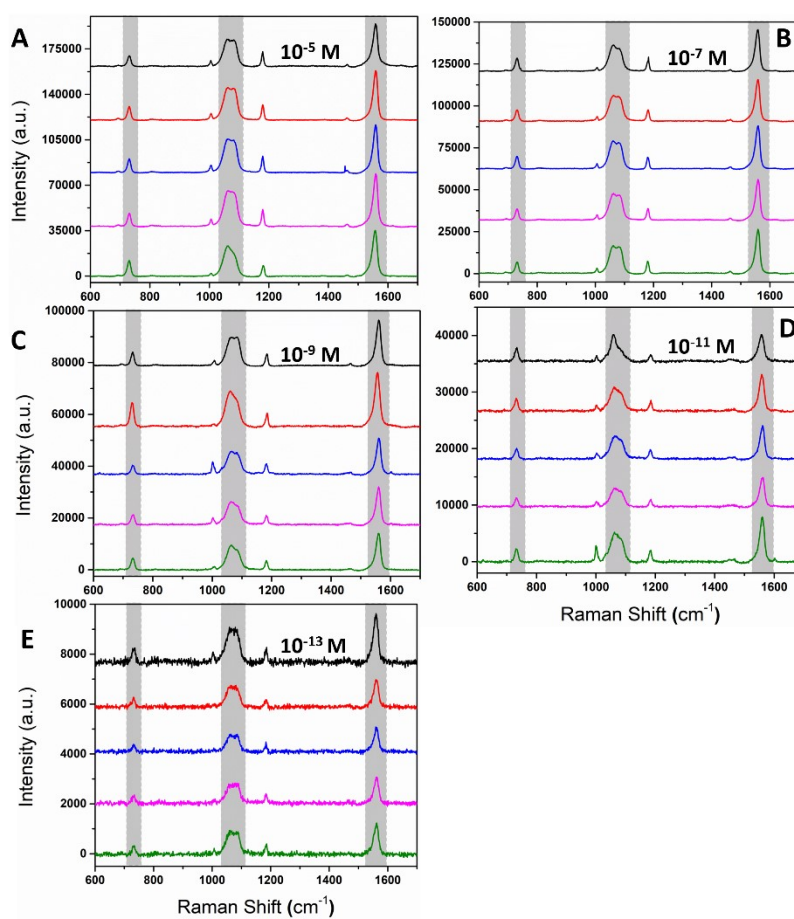

**Figure S8:** Shows the reproducibility of SERS signals for BDT at gradient concentrations used. A)  $10^{-5}$ M, B)  $10^{-7}$ M, C)  $10^{-9}$ M, D)  $10^{-11}$ M, and E)  $10^{-13}$ M (at 5 different spots on substrate).

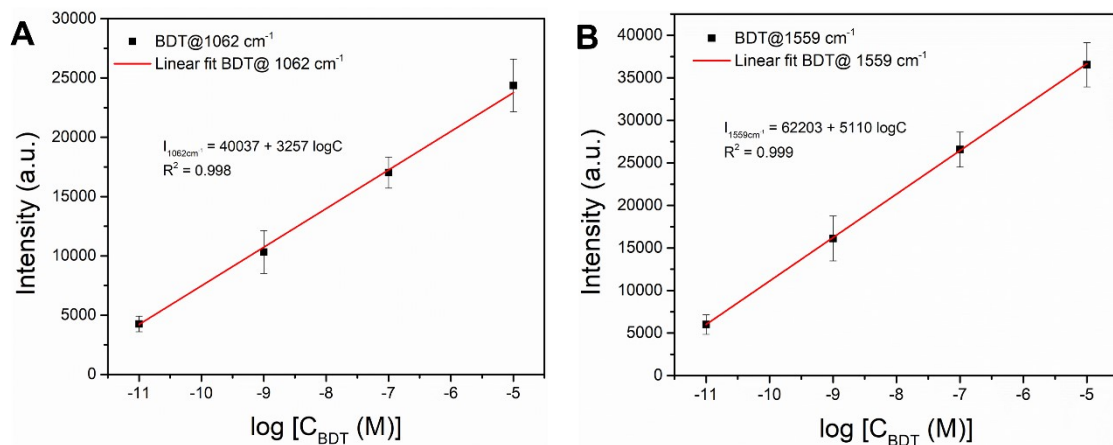

**Figure S9:** Data shows the linear relationship between SERS signal intensities versus different concentrations of 1,4-benzenedithiol (BDT) at Raman shift A) 1062  $\text{cm}^{-1}$ , and B) 1559  $\text{cm}^{-1}$ .

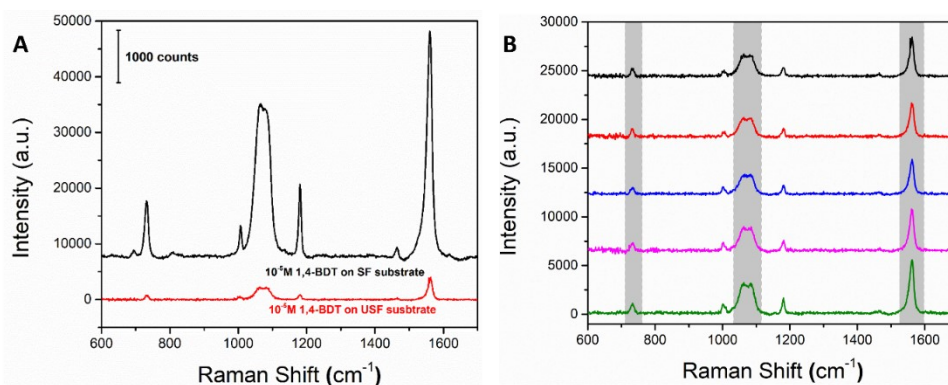

**Figure S10:** Represents the SERS signals of BDT. A) AuDBNRT deposited shrink film after heating the shrink film (black) vs without heating shrink film (red), B) Reproducibility of SERS signals of  $10^{-5}\text{M}$  of BDT on AuDBNRT deposited shrink film (without heating).

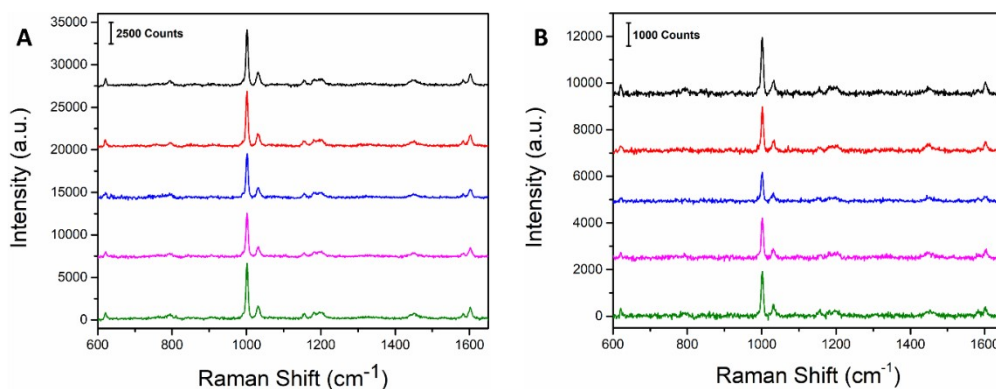

**Figure S11:** Represents the SERS signals of A) bare shrink film (plain) before heating, and B) bare wrinkled shrink film after heating (at 5 different spots on shrink film).
